# Supplementary material for: Integrative data analysis to identify persistent post-concussion deficits and subsequent musculoskeletal injury risk: project structure and methods
Source: PubMed Central journal article supplement — BMJ Open Sport Exerc Med. 2024 Jan 19;10(1):e001859. doi: 10.1136/bmjsem-2023-001859 (PMC10806548; doi:10.1136/bmjsem-2023-001859), 2024-01-19
Supplement: bmjsem-2023-001859supp001.pdf [file bmjsem-2023-001859supp001.pdf]

Supplemental Table 1. Important Demographic and Health History Information from Baseline Sheet

| <b>Demographic</b>    | <b>Description</b>                                     | <b>Variable type</b>  | <b>Variable Normal/Expected Range</b>     |
|-----------------------|--------------------------------------------------------|-----------------------|-------------------------------------------|
| Biological sex        | Male or Female                                         | Binary                | Male, female                              |
| Age                   | How old they were at the time of testing               | Continuous            | 18-24                                     |
| Sport Code            | Number assigned to each sport                          | Numeric               | 1-20                                      |
| <b>Health History</b> |                                                        |                       |                                           |
| Contact sport history | If they ever played a contact sport                    | Binary                | Yes, no                                   |
| Concussion history    | If they have ever had a concussion                     | Binary                | Yes, no                                   |
| Number of concussions | Total number of lifetime concussions                   | Numeric<br>Continuous | 0-10<br>Likely most will fall between 0-3 |
| Sleep disorder        | If they have a sleep disorder                          | Binary                | Yes, no                                   |
| Balance disorder      | If they have a balance disorder                        | Binary                | Yes, no                                   |
| Vestibular disorder   | If they have a vestibular disorder                     | Binary                | Yes, no                                   |
| Vertigo               | If they have vertigo                                   | Binary                | Yes, no                                   |
| Motion Sickness       | If they experience motion sickness                     | Binary                | Yes, no                                   |
| Psychiatric disorder  | If they have a diagnosed psychiatric disorder          | Binary                | Yes, no                                   |
| Mood disorder         | If they have a diagnosed mood disorder                 | Binary                | Yes, no                                   |
| Anxiety               | If they have diagnosed anxiety                         | Binary                | Yes, no                                   |
| Depression            | If they have been diagnosed with depression            | Binary                | Yes, no                                   |
| ADD/ADHD              | If they have been diagnosed with ADD or ADHD           | Binary                | Yes, no                                   |
| Learning Disability   | If they have been diagnosed with a learning disability | Binary                | Yes, no                                   |
| Bipolar               | If they have a diagnosis of bipolar disorder           | Binary                | Yes, no                                   |
| Loss of Consciousness | If they lost consciousness from a concussion           | Binary                | Yes, no                                   |
| Amnesia               | Did they experience memory loss from a concussion?     | Binary                | Yes, no                                   |
