# Supplementary material for: Integrative data analysis to identify persistent post-concussion deficits and subsequent musculoskeletal injury risk: project structure and methods
Source: PubMed Central journal article supplement — BMJ Open Sport Exerc Med. 2024 Jan 19;10(1):e001859. doi: 10.1136/bmjsem-2023-001859 (PMC10806548; doi:10.1136/bmjsem-2023-001859), 2024-01-19
Supplement: bmjsem-2023-001859supp002.pdf [file bmjsem-2023-001859supp002.pdf]

Supplemental Table 2. Data Collected at Baseline and Post-Injury Timepoints from Clinical Tests

| Variable                                                  | Description                                                                                                                       | Variable Type, Direction                                                           | Variable Normal/Expected Range         |
|-----------------------------------------------------------|-----------------------------------------------------------------------------------------------------------------------------------|------------------------------------------------------------------------------------|----------------------------------------|
| Prior Injuries                                            | Total number of injuries sustained before concussion                                                                              | Numeric                                                                            | 0-13                                   |
| DT Cognitive Outcomes                                     | Cognitive accuracy and number of correct responses                                                                                | Numeric Continuous<br>Numeric Continuous                                           | 0-100<br>0-15                          |
| Balance Error Scoring System (BESS) <sup>B</sup>          | Total number of balance errors                                                                                                    | Numeric<br>Lower is better                                                         | 0-60                                   |
| Graded Symptom Checklist (SCAT5) <sup>B</sup>             | Total number of symptoms (0-22), weighted symptom total (0-132) on SCAT5                                                          | Numeric<br>Lower is better                                                         | 0-22, 0-132                            |
| Computerized Neurocognitive Test <sup>B</sup>             | Four composite outcome scores including Verbal Memory, Visual Memory, Processing Speed, and Reaction Time on ImPACT               | Numeric Continuous<br>Lower is worse<br>EXCEPT for Reaction Time (Higher is worse) | 0-100<br>Reaction Time: 0 to 1.5       |
| King-Devick Test <sup>B</sup>                             | Horizontal Saccades measured by the total time to complete the three cards                                                        | Numeric Continuous<br>Lower is better                                              | 20 to 60                               |
| Tandem Gait Single Task (ST)/ Dual Task (DT) <sup>B</sup> | Time to complete the 3m ST/DT trails and the DT cost                                                                              | Numeric Continuous<br>Lower is better                                              | 10 to 30                               |
| Clinical Reaction Time                                    | Reaction time to catch a weighted dowel                                                                                           | Numeric Continuous<br>Lower is better                                              | 130 to 300                             |
| Vestibular Ocular Motor Screening (VOMS) <sup>B</sup>     | Assessment of smooth pursuits, saccadic eye movements, vestibular ocular reflexes, motion sensitivity, and near point convergence | Numeric<br>Lower is better                                                         | 1. 0-10<br>2. 0-20                     |
| Sideline Assessment of Concussion (SAC) <sup>B</sup>      | A brief cognitive test                                                                                                            | Numeric<br>Lower is worse                                                          | 0-30<br>Likely will fall between 20-30 |
| Trail Making Test <sup>B</sup>                            | A brief cognitive test where they connect points either numerically and/or alphabetically                                         | Continuous<br>Lower is better                                                      | 0-40                                   |
| Satisfaction with Life Survey (SWLS) <sup>A,B</sup>       | How satisfied they are with their lives                                                                                           | Numeric<br>Lower is worse                                                          | 0-40                                   |
| Hospital Anxiety and Depression Scale (SWLS) <sup>A</sup> | Total score for both anxiety (0-21) and depression (0-21)                                                                         | Numeric<br>Lower is better                                                         | 0-21                                   |
| Brief Symptom Inventory-18 (BSI-18) <sup>A,B</sup>        | Total score (0-72) with a higher score reflecting greater psychological distress                                                  | Numeric<br>Lower is better                                                         | 0-72                                   |

<sup>A</sup> Collected only during baseline concussion testing

<sup>B</sup>NINDS CDEs
